# Supplementary material
Source: HighWire-hosted journal article supplement (http://cmajopen.ca/highwire/filestream/80933/field_highwire_adjunct_files/0/2016-0085_original_submission.pdf)

1  
2  
3 **Screening for communication delay at the 18-month scheduled health**  
4 **supervision visit in primary care**  
5  
6  
7  
8  
9

10 Meta van den Heuvel MD MSc<sup>1,4,5,6</sup>, Cornelia M. Borkhoff PhD<sup>1,2,5</sup>, Chris  
11 Koroshegy MA<sup>1</sup>, Weeda Zabih MD MPH<sup>1</sup>, Sijmen A. Reijneveld MD PhD<sup>6</sup>,  
12 Jonathon Maguire MD MSc FRCPC<sup>1,2,3,4,5</sup>, Catherine Birken MD MSc FRCP<sup>1,2,3,5</sup>,  
13 Patricia Parkin MD FRCPC<sup>1,2,5</sup> on behalf of the *TARGet Kids!* Collaboration\*  
14  
15  
16  
17  
18  
19  
20

21  
22 \**TARGet Kids!* Collaboration – Scientific Committee: Kawsari Abdullah, Laura N.  
23 Anderson, Catherine S. Birken, Cornelia M. Borkhoff, Sarah Carsley, Yang  
24 Chen, Mikael Katz-Lavigne, Kanthi Kavikondala, Christine Koroshegyi, Grace  
25 Jieun Lee, Jonathon L. Maguire, Dalah Mason, Jessica Omand, Patricia C.  
26 Parkin, Navindra Persaud, Meta van den Heuvel, Weeda Zabih; Site  
27 Investigators: Jillian Baker, Tony Barazzino, Joey Bonifacio, Douglas Campbell,  
28 Sohail Cheema, Brian Chisamore, Karoon Danayan, Paul Das, Mary Beth  
29 Derocher, Anh Do, Michael Dorey, Sloane Freeman, Keewai Fung, Charlie  
30 Guiang, Curtis Handford, Hailey Hatch, Sheila Jacobson, Tara Kiran, Holly  
31 Knowles, Bruce Kwok, Sheila Lakhoo, Margarita Lam-Antoniades, Eddy Lau,  
32 Fok-Han Leung, Jennifer Loo, Sarah Mahmoud, Rosemary Moodie, Julia Morinis,  
33 Sharon Naymark, Patricia Neelands, James Owen, Michael Peer, Marty  
34 Perlmutar, Navindra Persaud, Andrew Pinto, Michelle Porepa, Nasreen Ramji,  
35 Noor Ramji, Alana Rosenthal, Janet Saunderson, Rahul Saxena, Michael Sgro,  
36  
37  
38  
39  
40  
41  
42  
43  
44  
45  
46  
47  
48  
49  
50  
51  
52  
53  
54  
55  
56  
57  
58  
59  
60

1  
2  
3 Susan Shepherd, Barbara Smiltnieks, Carolyn Taylor, Thea Weisdors, Sheila  
4  
5  
6 Wijayasinghe, Peter Wong, Ethel Ying, Elizabeth Young.  
7  
8  
9

10 **Affiliations:**

11  
12 <sup>1</sup>Pediatric Outcomes Research Team (PORT), Division of Pediatric Medicine,  
13  
14 Department of Pediatrics, The Hospital for Sick Children, Toronto, Ontario;  
15  
16

17 <sup>2</sup>Institute for Health Policy, Management and Evaluation, University of Toronto,  
18  
19 Toronto, Ontario;  
20  
21

22 <sup>3</sup>The Applied Health Research Centre of the Li Ka Shing Knowledge Institute of  
23  
24 St. Michael's Hospital, University of Toronto, Toronto, Ontario;  
25  
26

27 <sup>4</sup>Department of Pediatrics, St. Michael's Hospital, Toronto, Ontario;  
28

29 <sup>5</sup>Department of Pediatrics, Faculty of Medicine, University of Toronto, Toronto,  
30  
31 Ontario  
32  
33

34 <sup>6</sup>Department of Health Sciences, University Medical Center Groningen,  
35  
36 University of Groningen, Groningen, the Netherlands  
37  
38  
39  
40

41 **Corresponding Author:**

42 Patricia Parkin MD, FRCPC  
43 Division of Pediatric Medicine and the Pediatric Outcomes Research Team  
44 (PORT)  
45 Professor, Department of Pediatrics, Faculty of Medicine; and Institute of Health  
46 Policy, Management and Evaluation, Dalla Lana School of Public Health,  
47 University of Toronto  
48 Senior Associate Scientist, Child Health Evaluative Sciences, Hospital for Sick  
49 Children Research Institute  
50 Located: Peter Gilgan Center for Research and Learning  
51 10th floor, room: 10.9708  
52 686 Bay Street, M5G0A4, Toronto, ON, Canada  
53 Tel: 416-813-7654 ext. 301544; Fax: 416 813-5663  
54 [patricia.parkin@sickkids.ca](mailto:patricia.parkin@sickkids.ca)  
55  
56  
57  
58  
59  
60

1  
2  
3  
4  
5  
6 **Word count (excluding summary, tables, figures and references): 2478**  
7  
8

9  
10 **Number of figures: 2**  
11  
12

13  
14  
15 **Number of tables: 3**  
16  
17

18  
19  
20 **Competing Interests:** The authors declare that they have no competing  
21  
22 interests.  
23  
24

25  
26  
27 **Funding:** Funding to support TARGet Kids! was provided by multiple sources  
28  
29 including the Canadian Institutes for Health Research (CIHR), namely the  
30  
31 Institute of Human Development, Child and Youth Health and the Institute of  
32  
33 Nutrition, Metabolism and Diabetes, as well as, the St. Michael's Hospital  
34  
35 Foundation. The Paediatric Outcomes Research Team is supported by a grant  
36  
37 from The Hospital for Sick Children Foundation. Funding agencies had no role in  
38  
39 the design, collection, analyses or interpretation of the results of this study or in  
40  
41 the preparation, review, or approval of the manuscript.  
42  
43  
44  
45

46  
47  
48 **Acknowledgements:** We would like to thank all of the participating families for  
49  
50 their time and involvement in TARGet Kids! and are grateful to all practitioners  
51  
52 who are currently involved in the TARGet Kids! research network. Steering  
53  
54 Committee: Tony Barozzino, Brian Chisamore, Mark Feldman, Moshe Ipp.  
55  
56  
57  
58  
59  
60

1  
2  
3  
4  
5  
6  
7  
8  
9  
10  
11  
12  
13  
14  
15  
16  
17  
18  
19  
20  
21  
22  
23  
24  
25  
26  
27  
28  
29  
30  
31  
32  
33  
34  
35  
36  
37  
38  
39  
40  
41  
42  
43  
44  
45  
46  
47  
48  
49  
50  
51  
52  
53  
54  
55  
56  
57  
58  
59  
60

Research Team: Kathleen Abreo, Dharma Dalwadi, Tarandeep Malhi, Antoinetta Pugliese, Megan Smith, Laurie Thompson. Applied Health Research Centre: Christopher Allen, Hannah Chung, Gerald Lebovic, Magda Melo. Mount Sinai Services Laboratory: Azar Azad.

Confidential

## ABSTRACT

**Background:** Communication delays are often the first presenting problem in infants with a range of developmental disabilities. With early detection, intervention can be initiated. The 18-month Nipissing District Developmental Screen (NDDS) was created as a general developmental screening tool for use in primary care. Our objective was to examine how well the 18-month NDDS identifies communication delays.

**Methods:** Infants were recruited during scheduled health supervision visits. Parents completed both the 18-month NDDS and Infant Toddler Checklist (ITC). The ITC is a validated tool for detecting expressive speech and other communication delays. We assessed criterion validity (diagnostic test properties, overall agreement) for one or more “no responses” (1+NDDS flag) and two or more “no responses” (2+NDDS flag) using the ITC as a criterion measure.

**Results:** The study included 348 children (mean age  $18.6 \pm 0.7$  months). The 1+NDDS flag had good to modest sensitivity (90% and 78%), poor specificity (64% and 64%), and a fair agreement (0.28) to identify expressive speech and other communication delays respectively. The 2+NDDS flag had poor sensitivity (43% and 67%), good specificity (86% and 89%) and moderate agreement (0.45) to identify expressive speech and other communication delays respectively.

1  
2  
3 **Interpretation:** The low specificity of the 1+NDDS flag may lead to over-  
4  
5 diagnosis and cause unnecessary concern for parents. The low sensitivity of the  
6  
7 2+NDDS flag may lead to under-diagnosis suggesting that infants who could  
8  
9 benefit from early intervention may not be identified. The NDDS does not have  
10  
11 adequate characteristics to accurately identify children with a range of  
12  
13 communication delays.  
14  
15  
16  
17  
18  
19

20 **Key words:** infants, communication, speech concern  
21  
22  
23  
24  
25  
26  
27  
28  
29  
30  
31  
32  
33  
34  
35  
36  
37  
38  
39  
40  
41  
42  
43  
44  
45  
46  
47  
48  
49  
50  
51  
52  
53  
54  
55  
56  
57  
58  
59  
60

Confidential

## Introduction

Communication delays are often the first presenting problem in young children with a range of developmental disabilities including isolated expressive speech delay, autism spectrum disorder (ASD) and intellectual disability.<sup>1-3</sup>

Approximately 20% of toddlers have expressive speech delay, which resolves in about 50% by five years of age.<sup>4</sup> Children with persistent communication delays have poorer outcomes in reading, spelling, math skills and increased emotional and behavioral difficulties.<sup>4,5</sup> A recent systematic review commissioned by the US Preventive Services Task Force concluded that several screening tools can accurately identify speech and language delay in early childhood.<sup>6</sup>

Developmental screening has been identified as a priority topic by the Canadian Task Force on Preventive Health Care.<sup>7</sup> The Nipissing District Developmental Screen (NDDS) is a parent-completed questionnaire that addresses different areas of development including communication.<sup>8</sup> The Canadian Paediatric Society, supported by the College of Family Physicians of Canada, recommends the NDDS as one of the screening tools that could be used at the 18-month well-baby visit.<sup>9</sup> The Government of Ontario has made the NDDS freely accessible. As a result, the NDDS is currently one of the most widely used developmental screening tools in Ontario.<sup>8,9</sup> Despite this, the psychometric properties of the NDDS are not well known. The accuracy of the NDDS in identifying early communication delays has never been investigated.

The Infant Toddler Checklist (ITC) was originally developed for early identification of children who have or are at-risk for developing a communication

1  
2  
3 impairment.<sup>1,10,11</sup> More recently, the ITC was assessed for the accuracy of  
4  
5 detecting a range of developmental delays, including language delay, global  
6  
7 developmental delay, and ASD.<sup>12-14</sup> The ITC has been shown to be valid, reliable  
8  
9 and has good diagnostic test properties.<sup>1,11,13,14</sup> The ITC is freely available online  
10  
11 and is one of two measures recommended for the early detection of ASD in  
12  
13  
14  
15 Canada.<sup>15,16</sup>

16  
17 The identification of delays in speech and language acquisition is a core activity  
18  
19 in child health supervision.<sup>17</sup> Since the NDDS is one of the most widely used  
20  
21 developmental screening tools in Canada, our primary objective was to assess  
22  
23 the validity of the 18-month NDDS compared with the ITC. As parents and  
24  
25 clinicians commonly monitor the number of words spoken in early childhood as a  
26  
27 measure of language development, our secondary objective was to describe  
28  
29 parent responses regarding their 18-month old child from both screening tools.  
30  
31  
32  
33  
34  
35  
36  
37  
38  
39  
40

## 41 **Methods**

### 42 **Participants and Setting**

43 This study used a cross-sectional design. Infants, aged 18-20 months, were  
44  
45 recruited during scheduled health supervision visits from primary care practices  
46  
47 participating in *TARGetKids!*, a practice-based research network in Toronto,  
48  
49 Canada.<sup>18</sup> The study protocol, including recruitment procedures, has recently  
50  
51 been published.<sup>18</sup>

52  
53 Children were included if their parents completed both the 18-month  
54  
55 NDDS and the ITC. Participant characteristics were collected using a  
56  
57  
58  
59  
60



1  
2  
3 standardized instrument based on the Canadian Health Measures Survey.<sup>19</sup>  
4

5 Exclusion criteria were: children with health conditions affecting growth, acute or  
6  
7 chronic conditions (other than asthma), known severe developmental delay, and  
8  
9 families unable to communicate in English. All data were entered into a web-  
10  
11 based data management system (Medidata Rave ®). Research Ethics Boards  
12  
13 approval was obtained from the Hospital for Sick Children and St. Michael's  
14  
15 Hospital, Toronto, Canada.  
16  
17  
18  
19  
20

## 21 22 **Measures**

### 23 24 *18-month Nipissing District Developmental Screen (NDDS)*

25  
26 The 18-month NDDS is a one page, 17-item parent-completed tool. Each  
27  
28 question addresses one or more areas of development: fine motor, gross motor,  
29  
30 emotional, social, self-help, learning, thinking, communication.<sup>8</sup> Ten questions  
31  
32 address communication.  
33  
34  
35

36  
37 In 2011, the wording of question six: "Does your child say 5 or more  
38  
39 words?" was changed to "Does your child say 20 or more words?". The NDDS  
40  
41 authors provide a rationale for this change, highlighting the importance of early  
42  
43 referral to a speech pathologist in children with a suspected delay and refer to  
44  
45 the MacArthur-Bates Communicative Developmental Inventories (MB-CDI).<sup>20, 21</sup>  
46  
47 In our study we used the 2011 version of the NDDS.  
48  
49

50  
51 The NDDS takes five minutes to complete. Response options are "yes" or  
52  
53 "no". One or more "no" responses (i.e., the child does not demonstrate the  
54  
55 behaviour) indicates the need for further assessment and/or referral. This is  
56  
57  
58  
59  
60

1  
2  
3 known as the “one flag” rule (1+NDDS flag). The “two flag” rule requires a  
4  
5 minimum of two “no” responses for referral and/or follow-up (2+NDDS flag).  
6  
7  
8 Currently, the instructions of the 18-month NDDS recommend a “one flag” rule to  
9  
10 follow-up with the healthcare and/or childcare professional regarding the child’s  
11  
12 development.<sup>8</sup> Since there is little known about the validity of the NDDS to  
13  
14 identify communication problems, we assessed both the “one flag” and “two flag”  
15  
16 rule for the NDDS with the ITC.  
17  
18  
19  
20  
21

### 22 *Infant Toddler Checklist (ITC)*

23  
24 The ITC is a one page, 24-item parent-completed tool.<sup>10, 15</sup> The ITC was  
25  
26 developed to measure language predictors in order to determine if a  
27  
28 communication evaluation is needed.<sup>1,10,11</sup> It is a standardized tool with normative  
29  
30 scores for monthly intervals for children 6-24 months of age. Most questions are  
31  
32 answered with a 3-point scale; “not yet” “sometimes” “often”. The ITC takes five  
33  
34 minutes to complete and two minutes to score.<sup>1,14</sup> Scoring produces three  
35  
36 composite scores (social composite, expressive speech composite, symbolic  
37  
38 composite) and a total score. The total score and each of the three composite  
39  
40 scores are dichotomized as “concern/no concern” using the 10th percentile cut-  
41  
42 point. It is recommended that a child should be carefully monitored if the  
43  
44 expressive speech composite is below the 10th percentile (concern for  
45  
46 expressive speech delay) and the ITC should be re-administered again in three  
47  
48 months.<sup>10,15</sup> Additionally, it is recommended that a child should be referred for an  
49  
50  
51  
52  
53  
54  
55  
56  
57  
58  
59  
60

1  
2  
3 evaluation if the social composite, symbolic composite or the total score is below  
4  
5 the 10th percentile (concern for other communication delay).<sup>10,15</sup>  
6  
7  
8  
9

## 10 **Statistical analysis**

11  
12 Means, standard deviations and percentages were calculated to  
13  
14 characterize the study participants. We assessed criterion validity of the 18-  
15  
16 month NDDS by calculating diagnostic test properties and overall agreement. For  
17  
18 the purpose of our analysis, the ITC was considered a criterion measure.  
19  
20 Diagnostic test properties (sensitivity, specificity, positive predictive value,  
21  
22 negative predictive value) of the 18-month NDDS compared with the  
23  
24 dichotomized scores of the ITC were calculated (with 95% confidence intervals).  
25  
26 For a screening tool, a sensitivity of 80% and a specificity of 90% are generally  
27  
28 recommended.<sup>22</sup> For developmental screening tools, a sensitivity between 70%-  
29  
30 80% and a specificity of 80% has been suggested.<sup>23</sup>  
31  
32  
33  
34  
35

36 Cohen's kappa coefficients were calculated as measure of overall  
37  
38 agreement between the NDDS and ITC. Cohen's kappa gives a quantitative  
39  
40 assessment of how well the two tools agree. Levels of agreement below 0.20,  
41  
42 between 0.21-0.40, between 0.41-0.60, and above 0.61 are considered poor, fair,  
43  
44 moderate, and good, respectively.<sup>24</sup>  
45  
46  
47

48 Finally, we described the number of words spoken by 18-month old  
49  
50 children according to parent responses on a comparable single question on both  
51  
52 the NDDS and ITC calculating proportions. All analyses were performed with IBM  
53  
54 SPSS 20.  
55  
56  
57  
58  
59  
60

## Results

### *Participant characteristics*

We included 348 children with a mean age of 18.6 months ( $\pm$  0.7 months) (Table 1). On the NDDS, 138 (39.7%) children had 1+flag and 54 (15.8%) had 2+flags (Figure 1). On the ITC, 21 (6.0%) children were identified with an expressive speech delay (concern on the expressive speech composite); 27 (7.8%) children were identified with a communication delay needing referral (concern on the social composite, symbolic composite, or total score).

### *Diagnostic test properties of the 18-month NDDS compared with the ITC*

To identify children with an expressive speech delay, the 1+NDDS flag was sensitive (90%, 95% CI 68%-98%) but not specific (64%, 95% CI 58%-69%).

The 2+NDDS flag reduced the sensitivity (43%, 95% CI 23%-66%) but increased the specificity (86%, 95% CI 82%-90%). To identify children with other communication delays (concerns on the communication composite, symbolic composite or total score), the 1+NDDS flag was modestly sensitive (78%, 95% CI 57%-90%) but not specific (64%, 95% CI 58%-69%). The 2+NDDS flag reduced the sensitivity (67%, 95% CI 46%-83%) but increased the specificity (89%, 95% CI 85%-92%). (Tables 2 and 3).

### *Overall agreement of the 18-month NDDS with the ITC*

The 1+NDDS flag had a fair agreement (Cohen's kappa 0.28) with the need for monitoring or referral for communication delays on the ITC (concerns on any

1  
2  
3 composite or total score). The 2+NDDS flag had a moderate agreement (Cohen's  
4 kappa 0.45) with the need for monitoring or referral for communication delays on  
5  
6 the ITC (concerns on any composite or total score).  
7  
8  
9

### 10 11 12 *Description of parent responses regarding the number of words spoken*

13  
14  
15 Question 6 of the 18-month NDDS "Does your child speak more than 20 words?"  
16  
17 was the question with the greatest number (n=85, 24.4%) of parents responding  
18  
19 "no" (Figure 2). Question 17 on the ITC "About how many different words does  
20  
21 your child use meaningfully that you recognize?" identified five (1.3%) children  
22  
23 who spoke no words at all, 21 (6.0%) who spoke 1-3 words, 81 (23.3%) who  
24  
25 spoke 4-10 words, 133 (38.2%) who spoke 11-30 words and 107 (30.7%) who  
26  
27 spoke more than 30 words.  
28  
29  
30  
31

### 32 33 **Interpretation**

34  
35 This is the first study to investigate whether the 18-month NDDS can identify  
36  
37 communication delays in early childhood in a primary care setting. Compared  
38  
39 with the ITC, the 1+NDDS flag had modest to good sensitivity, poor specificity,  
40  
41 and fair agreement, to identify expressive speech delay and other communication  
42  
43 delays. Thus, the 1+NDDS flag cut-point may result in a large number of false  
44  
45 positives leading to over-diagnosis. The 2+NDDS flag had poor sensitivity, good  
46  
47 specificity and moderate agreement, to identify expressive speech delay and  
48  
49 other communication delays. Thus, the 2+NDDS flag cut-point may result in a  
50  
51 large number of false negatives leading to under-diagnosis. Taken together,  
52  
53 these findings suggest that the NDDS, at either cut-point, may not have adequate  
54  
55  
56  
57  
58  
59  
60

1  
2  
3 characteristics to accurately identify children with a range of communication  
4  
5 delays.  
6  
7

8           There are no studies of the NDDS in the published literature. However, the  
9  
10 report by Dahinten and Ford compared the previous (pre-2011) version of the  
11  
12 NDDS with the Bayley Scales of Infant Development II (BSID-II) at three ages (4,  
13  
14 18, 24 months; total n=118).<sup>25</sup> The authors identified a higher sensitivity and  
15  
16 specificity of the NDDS when using the 2+NDDS flag rule and -2SD cut-off  
17  
18 compared to the 1.5SD cut-off for the BSID-II. The authors concluded that the  
19  
20 NDDS was able to identify severe developmental delays but less effective at  
21  
22 identifying milder delays.<sup>26</sup> Preliminary results from the Psychometric  
23  
24 Assessment of the NDDS Study by Cairney et al. concluded that the 2011  
25  
26 version of the NDDS was very good at identifying children without developmental  
27  
28 delay, but when used alone it potentially misses children who would benefit from  
29  
30 further assessment.<sup>27</sup> Our findings are consistent with this previous research.  
31  
32  
33  
34  
35

36           In contrast to the NDDS, the ITC has undergone substantial validation  
37  
38 over the past two decades. The ITC was originally developed and normed in a  
39  
40 sample of US infants.<sup>1,28</sup> Concurrent and predictive validity in another sample of  
41  
42 more than 300 infants identified moderate to large correlation coefficients with  
43  
44 receptive and expressive language outcomes at 2 years (measured with the  
45  
46 Mullen Scales of Early Learning or the Preschool Language Scale).<sup>1</sup> In two  
47  
48 further studies of infants 12-24 months of age (n=232 and n=915), the ITC was  
49  
50 found to have a sensitivity of 87% and 86%, and a specificity of 75% and  
51  
52 83%.<sup>11,13</sup> However, these results should be interpreted with caution, as the  
53  
54  
55  
56  
57  
58  
59  
60

1  
2  
3 participants were not randomly sampled from the general population and  
4  
5 therefore had a higher prevalence of communication delays. In two samples of  
6  
7 children with a diagnosis of autism spectrum disorder (ASD) (n=18 and n=60),  
8  
9 the sensitivity of the ITC at 12-24 months of age was 95%.<sup>12,13</sup> The ITC was  
10  
11 recently assessed in primary care (137 pediatricians from 30 offices) at the 12  
12  
13 month visit.<sup>14</sup> Of 10,479 ITCs completed, 1,318 were positive (12.5%).<sup>14</sup> In a  
14  
15 subsample of 184 children who screened positive and agreed to an assessment  
16  
17 with a psychologist, the positive predictive value of the ITC was 75% for a range  
18  
19 of developmental disorders (ASD, language delay and global development  
20  
21 delay).<sup>14</sup> A survey of 92 participating pediatricians believed that the ITC was a  
22  
23 valuable screening tool.<sup>14</sup> The 13.8% prevalence of a positive ITC found in our  
24  
25 study is similar to that of the study in primary care practices.<sup>14</sup>  
26  
27  
28  
29  
30  
31

32 In our study, almost a quarter of the 18-month old infants did not speak 20  
33  
34 words or more according to parent report on the NDDS. Almost a third of the 18-  
35  
36 month old infants spoke 10 words or less according to parent report on the ITC.  
37  
38 Data from “Wordbank”, an open database about children’s vocabulary growth  
39  
40 that archives data from the MB-CDI of more than 5000 children, demonstrates a  
41  
42 very wide vocabulary range at 18 months; from 13.9 words (10th percentile) to  
43  
44 269 words (90th percentile).<sup>29</sup> The BSID (3rd edition) indicates that fewer than  
45  
46 eight words spoken for a 24-month-old is 1.33 standard deviations below the  
47  
48 normative mean.<sup>25</sup>  
49  
50  
51

52  
53 Our data demonstrates that many more parents responded “no” to  
54  
55 question 6 than any other question on the 18-month NDDS. This single question  
56  
57  
58  
59  
60

1  
2  
3 accounted for more than 60% of infants with a 1+NDDS flag. As parents  
4 commonly monitor their child's vocabulary, explanation about the broad  
5 vocabulary range at 18-months should be provided to parents who may worry  
6 unnecessarily over concerns identified with the 18-month NDDS. Additionally, it  
7 is important for child healthcare practitioners to be aware of the wide range of  
8 word attainment at 18-months, and the fair agreement and low specificity of the  
9 1+NDDS flag for identifying children with expressive speech delay as compared  
10 with the ITC.  
11  
12  
13  
14  
15  
16  
17  
18  
19  
20  
21

22 Strengths of this study include the use of a large infant population, and  
23 implementation in a primary care setting in Ontario, where the NDDS is routinely  
24 administered. This study also has some limitations. Children's communication  
25 was not assessed with an independent, standardized measure for comparison  
26 with the ITC and NDDS, such as the MB-CDI or the BSID. Because this study  
27 was conducted with a large group of infants in primary care, this was not feasible.  
28 Additionally, the NDDS is a general development screening tool whereas the ITC  
29 was initially developed to target communication delays, so it would be expected  
30 that some items (e.g., gross motor) on the NDDS would not correlate with the  
31 ITC. However a majority of questions of the 18-month NDDS address  
32 communication and the ITC has a high positive predictive value for detecting  
33 global developmental delay, making the comparison of both questionnaires  
34 justifiable. Additionally, the authors of the NDDS did not provide independent  
35 domains (e.g. "communication domain") therefore a specific validation was not  
36 feasible.  
37  
38  
39  
40  
41  
42  
43  
44  
45  
46  
47  
48  
49  
50  
51  
52  
53  
54  
55  
56  
57  
58  
59  
60



## Conclusion

Our results demonstrate that infants with communication delays will not be adequately identified with the 18-month NDDS. The low specificity of the 1+NDDS flag may lead to over-diagnosis and cause unnecessary concern for parents. The low sensitivity of the 2+NDDS flag may lead to under-diagnosis suggesting that infants who could benefit from early intervention may not be identified. The NDDS does not have adequate characteristics to accurately identify children with a range of communication delays. With communication delays often being the first presenting problem in young children with a range of developmental disabilities, the ITC may be a more promising screening tool for assessing developmental delay in early childhood.

## References

1. Wetherby AM, Allen L, Cleary J, et al. Validity and reliability of the communication and symbolic behavior scales developmental profile with very young children. *J Speech Lang Hear Res* 2002;45:1202-1218.
2. Reilly S, McKean C, Morgan A, et al. Identifying and managing common childhood language and speech impairments. *BMJ* 2015;350:h2318.
3. Carey W, Crocker A, Coleman W, et al. *Developmental-Behavioral Pediatrics, 4th edition*. Philadelphia: Philadelphia, 2009.
4. Reilly S, Wake M, Ukoumunne OC, et al. Predicting language outcomes at 4 years of age: findings from Early Language in Victoria Study. *Pediatrics* 2010;126:e1530-7.
5. Clegg J, Hollis C, Mawhood L, et al. Developmental language disorders--a follow-up in later adult life. Cognitive, language and psychosocial outcomes. *J Child Psychol Psychiatry* 2005;46:128-149.
6. Wallace IF, Berkman ND, Watson LR, et al. Screening for Speech and Language Delay in Children 5 Years Old and Younger: A Systematic Review. *Pediatrics* 2015;136: e448-62.
7. Canadian Task Force on Preventive Health Care. Developmental Delay Protocol. Available: <http://canadiantaskforce.ca/ctfphc-guidelines/2015-developmental-delay/protocol/> (accessed 2015 Dec. 29)
8. Nipissing District Developmental Screen (NDDS). Available: <http://www.ndds.ca/ontario> (accessed 2015 Dec. 28)
9. Williams R, Clinton J and Canadian Paediatric Society, Early Years Task Force. Getting it right at 18 months: In support of an enhanced well-baby visit. *Paediatr Child Health* 2011;16:647-654.
10. Wetherby A and Prizant B. *Communication and Symbolic Behavior Scales Developmental Profile- Preliminary Normed Edition*. Baltimore, MD, 2001.
11. Wetherby A, Goldstein H, Cleary J, et al. Early identification of children with communication disorders: Concurrent and predictive validity of the CSBS Developmental Profile. *Infants and Young Children* 2003;16(2):161-174.
12. Wetherby AM, Woods J, Allen L, et al. Early indicators of autism spectrum disorders in the second year of life. *J Autism Dev Disord* 2004;34:473-493.
13. Wetherby AM, Brosnan-Maddox S, Peace V, et al. Validation of the Infant-Toddler Checklist as a broadband screener for autism spectrum disorders from 9 to 24 months of age. *Autism* 2008;12:487-511.
14. Pierce K, Carter C, Weinfeld M, et al. Detecting, studying, and treating autism early: the one-year well-baby check-up approach. *J Pediatr* 2011;159:458-465.e1-6.

- 1  
2  
3  
4  
5  
6  
7  
8  
9  
10  
11  
12  
13  
14  
15  
16  
17  
18  
19  
20  
21  
22  
23  
24  
25  
26  
27  
28  
29  
30  
31  
32  
33  
34  
35  
36  
37  
38  
39  
40  
41  
42  
43  
44  
45  
46  
47  
48  
49  
50  
51  
52  
53  
54  
55  
56  
57  
58  
59  
60
15. Wetherby AM. and Barry MP. Communication and Symbolic Behavior Scales Developmental Profile; 2001. Available: [http://firstwords.fsu.edu/pdf/Checklist\\_Scoring\\_Cutoffs.pdf](http://firstwords.fsu.edu/pdf/Checklist_Scoring_Cutoffs.pdf) (accessed 2015 Dec. 29).
  16. Anagnostou E, Zwaigenbaum L, Szatmari P, et al. Autism spectrum disorder: advances in evidence-based practice. *CMAJ* 2014;186:509-519.
  17. O'Hare A and Bremner L. Management of developmental speech and language disorders: Part 1. *Arch Dis Child* 2015;0:1–6.doi:10.1136/archdischild-2014-307394
  18. Carsley S, Borkhoff CM, Maguire JL, et al. Cohort Profile: The Applied Research Group for Kids (TARGet Kids!). *Int J Epidemiol* 2014; 1–13doi: 10.1093/ije/dyu123
  19. Anonymous StatsCan. Canadian Health Measures Survey. Detailed information for January 2012 to December 2013 (Cycle 3). Available: <http://www23.statcan.gc.ca/imdb/p2SV.pl?Function=getSurvey&SDDS=5071> (accessed 2015, Jun. 24).
  20. Nipissing Distric Developmental Screen. Available: <http://www.ndds.ca/faq-on.html#FAQ12> (accessed 2015, Nov. 4).
  21. Fenson,L., Marchman, V.A., Thal, D.J., Dale, P.S., Reznick, J.S., Bates, E. *MacArthur-Bates Communicative Developmental Inventories: Users guide and technical manual*. Baltimore, 2007.
  22. Streiner D, Norman G and Cairney J. *Health measurement scales: a practical guide to their development and use*. Oxford, UK, 2014.
  23. Glascoe FP. Standards for Screening Test Construction, 2005. Available: <http://www2.aap.org/sections/dbpeds/pdf/standards%20for%20screening%20test%20construction.pdf> (accessed 2015, Dec. 29)
  24. Kwiecien R, Kopp-Schneider A and Blettner M. Concordance analysis: part 16 of a series on evaluation of scientific publications. *Dtsch Arztebl Int* 2011; 108: 515-521.
  25. Bayley N. *Bayley Scales of Infant Development III*. San Antonio: San Antonio, 2005.
  26. Dahinten S and Ford L. Validation of the Nipissing District Developmental Screen for use with infants and toddlers - working paper. 2004. University of British Columbia, Vancouver.
  27. Cairney, J, Clinton, J. Psychometric Assessment of the Nipissing District Developmental Screens Study (PANS) Available: <http://inchlabb.ca/previous-projects>. (accessed 2015, Dec. 29)
  28. Wetherby A and Prizant B. *Communication and Symbolic Behavior Scales - Normed Edition*. Applied Symbolix: Chicago, IL: Applied Symbolix, 1993.
  29. Wordbank: An open database of children's vocabulary development. Available: <http://wordbank.stanford.edu> (accessed 2015, Dec. 29)

**Table 1:** Participant characteristics

| <b>Characteristic</b>                   | <b>n = 348</b> |        |
|-----------------------------------------|----------------|--------|
|                                         | <b>n (%)</b>   |        |
| Age (months) mean ( $\pm$ SD)           | 18.6           | (0.7)  |
| Sex, male                               | 192            | (55.2) |
| Maternal education                      |                |        |
| - College / University                  | 328            | (94.4) |
| Nipissing District Developmental Screen |                |        |
| 1+ flag                                 | 138            | (39.7) |
| 2+ flags                                | 54             | (15.8) |
| Infant Toddler Checklist                |                |        |
| Expressive speech delay <sup>1</sup>    | 21             | (6.0)  |
| Other communication delays <sup>2</sup> | 27             | (7.8)  |

<sup>1</sup> **Need to monitor:** expressive speech composite below the 10th percentile

<sup>2</sup> **Need for referral:** social composite, symbolic composite or the total score below the 10th percentile

**Table 2:** Diagnostic test properties of the +1 NDDS flag compared with the ITC.

| <b>1+ NDDS flag</b>      | <b>ITC</b>                                 |           | <b>ITC</b>                                    |           |
|--------------------------|--------------------------------------------|-----------|-----------------------------------------------|-----------|
|                          | <b>Expressive Speech delay<sup>1</sup></b> |           | <b>Other communication delays<sup>2</sup></b> |           |
|                          | <b>Yes</b>                                 | <b>No</b> | <b>Yes</b>                                    | <b>No</b> |
| <b>Positive</b>          | 19                                         | 119       | 21                                            | 117       |
| <b>Negative</b>          | 2                                          | 208       | 6                                             | 204       |
| Sensitivity (%) (95% CI) | 90 (68-98)                                 |           | 78 (57-90)                                    |           |
| Specificity (%) (95% CI) | 64 (58-69)                                 |           | 64 (58-69)                                    |           |
| PPV (%) (95% CI)         | 14 (9-21)                                  |           | 15 (10-23)                                    |           |
| NPV (%) (95% CI)         | 99 (96-100)                                |           | 97 (94-99)                                    |           |

<sup>1</sup> **Need to monitor:** expressive speech composite below the 10th percentile

<sup>2</sup> **Need for referral:** social composite, symbolic composite or the total score below the 10th percentile

**Table 3:** Diagnostic test properties of the +2 NDDS flag compared with the ITC.

| <b>2+ NDDS flag</b>      | <b>ITC</b>                                  |           | <b>ITC</b>                                     |           |
|--------------------------|---------------------------------------------|-----------|------------------------------------------------|-----------|
|                          | <b>Expressive Speech delay <sup>1</sup></b> |           | <b>Other communication delays <sup>2</sup></b> |           |
|                          | <b>Yes</b>                                  | <b>No</b> | <b>Yes</b>                                     | <b>No</b> |
| <b>Positive</b>          | 9                                           | 45        | 18                                             | 36        |
| <b>Negative</b>          | 12                                          | 282       | 9                                              | 285       |
| Sensitivity (%) (95% CI) | 43 (23-66)                                  |           | 67 (46-83)                                     |           |
| Specificity (%) (95% CI) | 86 (82-90)                                  |           | 89 (85-92)                                     |           |
| PPV (%) (95% CI)         | 17 (8-30)                                   |           | 33 (21-48)                                     |           |
| NPV (%) (95% CI)         | 96 (93-98)                                  |           | 97 (94-99)                                     |           |

<sup>1</sup> **Need to monitor:** expressive speech composite below the 10th percentile

<sup>2</sup> **Need for referral:** social composite, symbolic composite or the total score below the 10th percentile

**Figure 1:** Percentage of children and the total number of questions failed on the 18-month NDDS

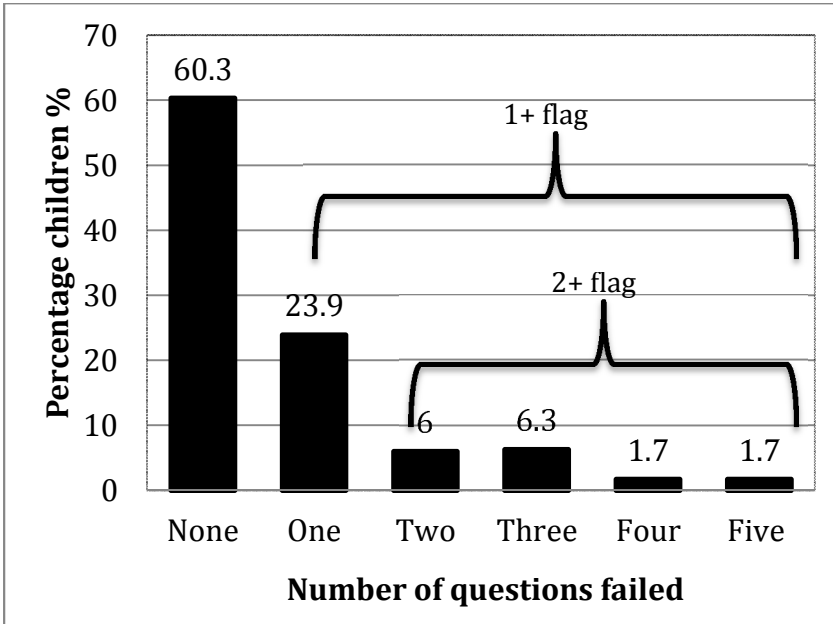

**Figure 2:** Percentage of parents responding with "no" and "yes" to the 18-month NDDS individual questions

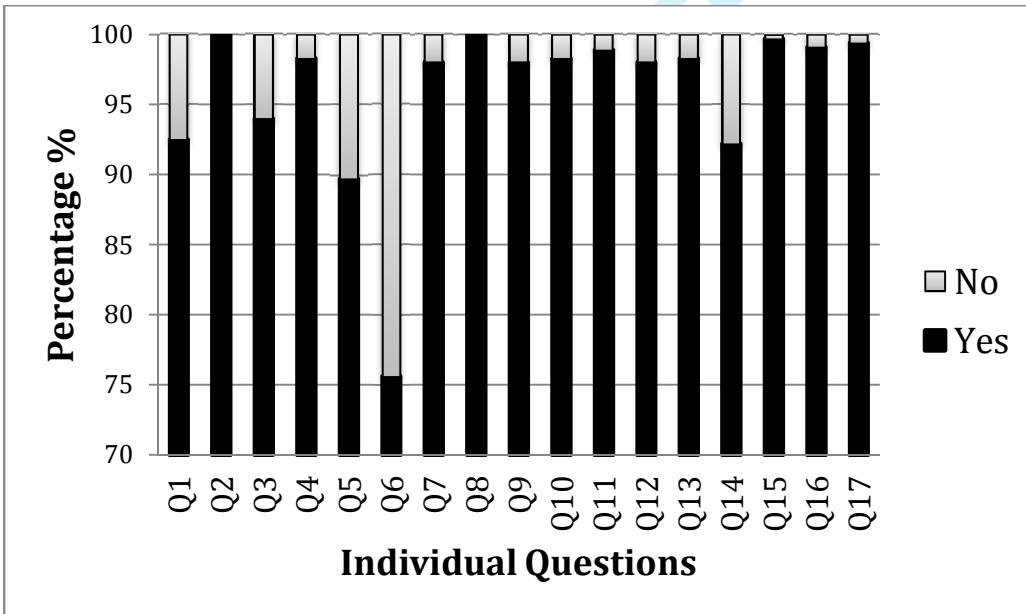

Supplement: 2016-0085_original_submission.pdf [file 2016-0085_original_submission.pdf]
